# Supplementary material for: A low-cost assay for hydrogen peroxide using sewage sludge-based carbon nanodots
Source: Royal Society of Chemistry journal article supplement (doi:10.1039/d4ew00197d), 2024-01-01
Supplement: d4ew00197d1.pdf [file d4ew00197d1.pdf]

## Supplementary Information

### **A low-cost assay for hydrogen peroxide using sewage sludge-based carbon nanodots**

Xiaonan Liu <sup>a, b, #</sup>, Long Wang <sup>c, #</sup>, Yuling Ye <sup>c</sup>, Zhicheng Pan <sup>a, \*</sup>, Aijie Wang <sup>d, \*</sup>, Wei Huang <sup>b, e, \*</sup>

<sup>a</sup> Postdoctoral Research Station of Haitian Water Group Co., Ltd, Chengdu, 610000, People's Republic of China.

<sup>b</sup> National Engineering Laboratory of Circular Economy, Sichuan University of Science and Engineering, Zigong, 643000, People's Republic of China.

<sup>c</sup> Sichuan Engineering Technology Research Center for High Salt wastewater Treatment and Resource Utilization, Sichuan University of Science and Engineering, Zigong, 643000, People's Republic of China.

<sup>d</sup> School of Environment, Harbin Institute of Technology, Harbin, 150000, People's Republic of China.

<sup>e</sup> Key Laboratories of Fine Chemicals and Surfactants in Sichuan Provincial Universities, Zigong 643000, People's Republic of China.

# These authors contributed equally to this work.

\* Corresponding author.

E-mail addresses: panzhicheng107@126.com (Z. Pan), waj0578@hit.edu.cn (A. Wang), weih1025@126.com (W. Huang).

## Chemicals and instrumentations

Sewage sludge (water content is 76.87%, volatile suspended solid is 10372±318 mg/L, total suspended solids is 18614±437 mg/L) was obtained from Haitian Water Group Co., Ltd (Zigong, China). ABTS was purchased from Sangon Biotech Co., Ltd. (Shanghai, China). H<sub>2</sub>O<sub>2</sub>, cupric sulfate (CuSO<sub>4</sub>), cobalt nitrate hexahydrate (Co(NO<sub>3</sub>)<sub>2</sub>·6H<sub>2</sub>O), aluminum chloride (AlCl<sub>3</sub>), magnesium sulfate (MgSO<sub>4</sub>), lanthanum trinitrate hexahydrate (Fe(NO<sub>3</sub>)<sub>2</sub>·6H<sub>2</sub>O), barium chloride (BaCl<sub>2</sub>), nickel chloride (NiCl<sub>2</sub>), zinc chloride (ZnCl<sub>2</sub>), ferric nitrate nonahydrate (Fe(NO<sub>3</sub>)<sub>2</sub>·9H<sub>2</sub>O), and sodium hypochlorite (NaClO) were obtained from Kelong Chemical Co., Ltd. (Chengdu, China). Silver nitrate (AgNO<sub>3</sub>), sodium bicarbonate (NaHCO<sub>3</sub>), sodium chloride (NaCl), potassium chloride (KCl), calcium chloride (CaCl<sub>2</sub>), and sodium sulphate (Na<sub>2</sub>SO<sub>4</sub>) were obtained from Jinshan Chemical Reagent Co., Ltd. (Chengdu, China). Boric acid (H<sub>3</sub>BO<sub>3</sub>), phosphoric acid (H<sub>3</sub>PO<sub>4</sub>), acetic acid, perchloric acid (HClO<sub>4</sub>), and sodium hydroxide (NaOH) were obtained from Sinopharm Chemical Reagent (Shanghai, China).

Fourier Transform infrared (FT-IR) spectrum of ss-CNDs was recorded with a TENSOR FT-IR spectrum analyzer. Transmission electron microscopy (TEM) images were acquired by FEI Tecnai F20. Ultraviolet-visible (UV-vis) absorption spectra were measured by a spectrophotometer (Hach DR6000). Electron paramagnetic resonance spectrum (EPR) were recorded using a Bruker EMXplus-6/1 electron paramagnetic resonance spectrometer. X-ray photoelectron spectroscopy (XPS) spectra were recorded using a K-Alpha X-ray photoelectron spectrometer. The binding energies were calibrated with respect to the residual C (1s) peak at 284.6 eV.

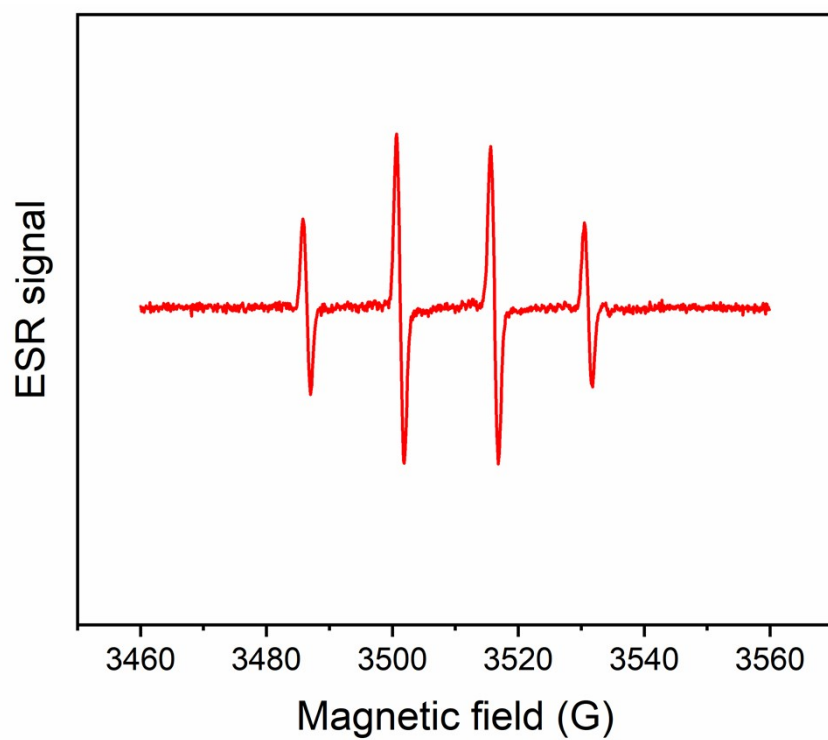

**Fig. S1.** EPR spectra obtained in the mixture of DMPO and H<sub>2</sub>O<sub>2</sub> in the presence of ss-CNDs.

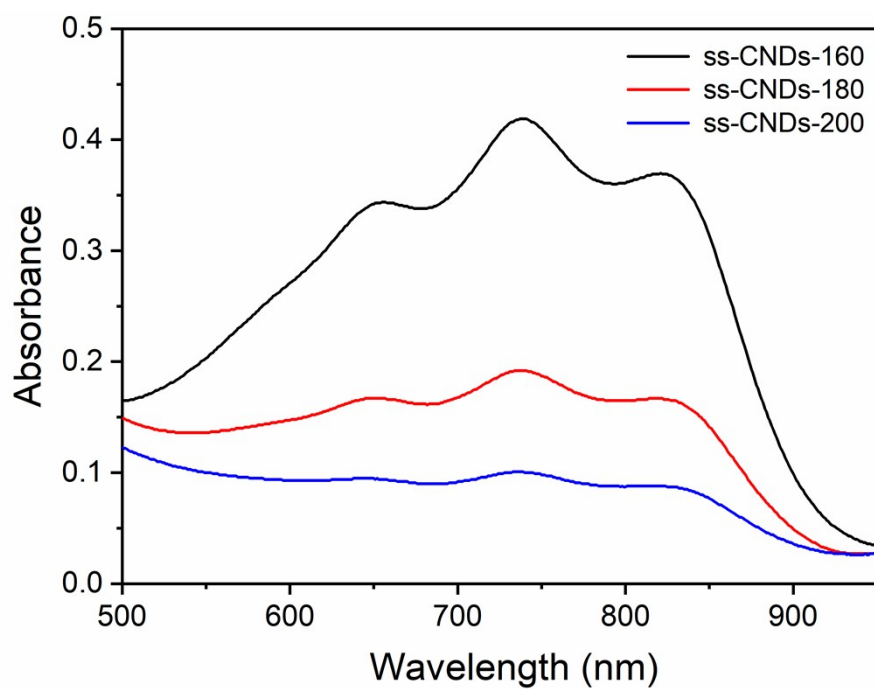

**Fig. S2.** UV-vis absorption spectra of the sensing system for  $\text{H}_2\text{O}_2$  by using ss-CNDs synthesized at three different carbonization temperatures (160°C, 180°C, and 200 °C) as colorimetric probe.

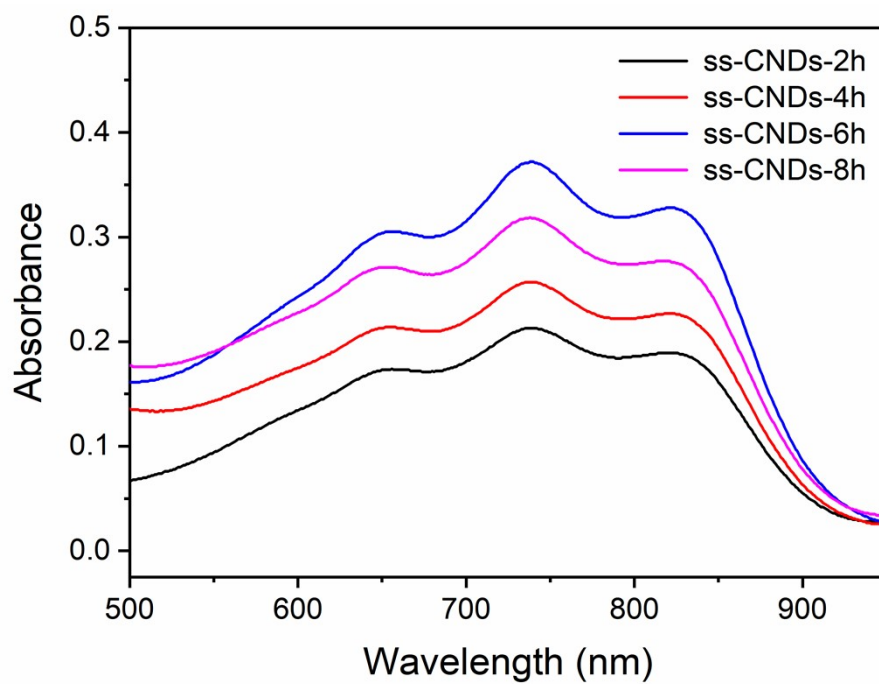

**Fig. S3.** UV-vis absorption spectra of the sensing system for  $\text{H}_2\text{O}_2$  by using ss-CNDs synthesized at four different carbonization times (2h, 4h, 6h, and 8h) as colorimetric probe.

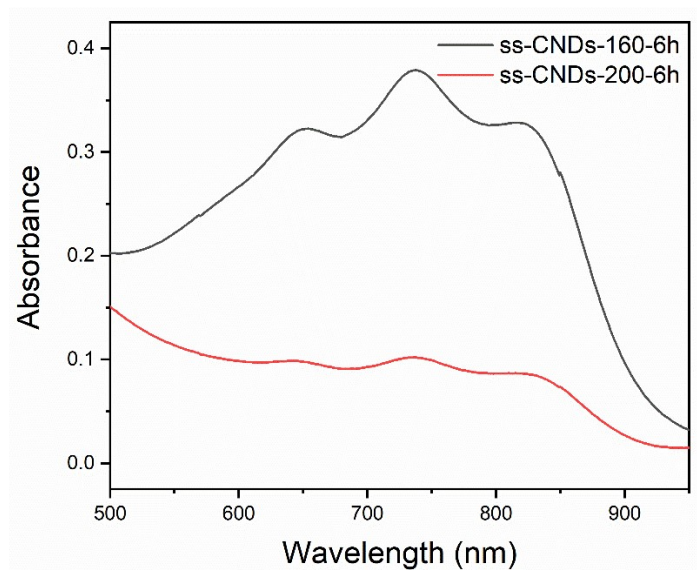

**Fig. S4.** UV-vis absorption spectra of the sensing system for  $\text{H}_2\text{O}_2$  by using ss-CNDs synthesized at different carbonization temperatures and time (160 °C for 6 h and 200 °C for 6 h) as colorimetric probe.

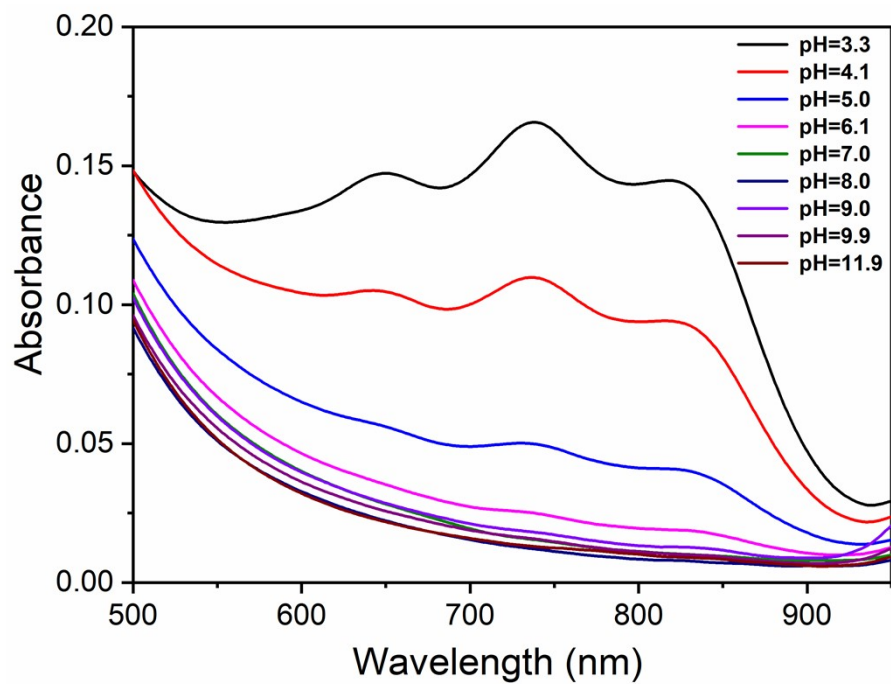

**Fig. S5.** UV-vis absorption spectra of sensing system for H<sub>2</sub>O<sub>2</sub> at different pH (3.3-11.9).

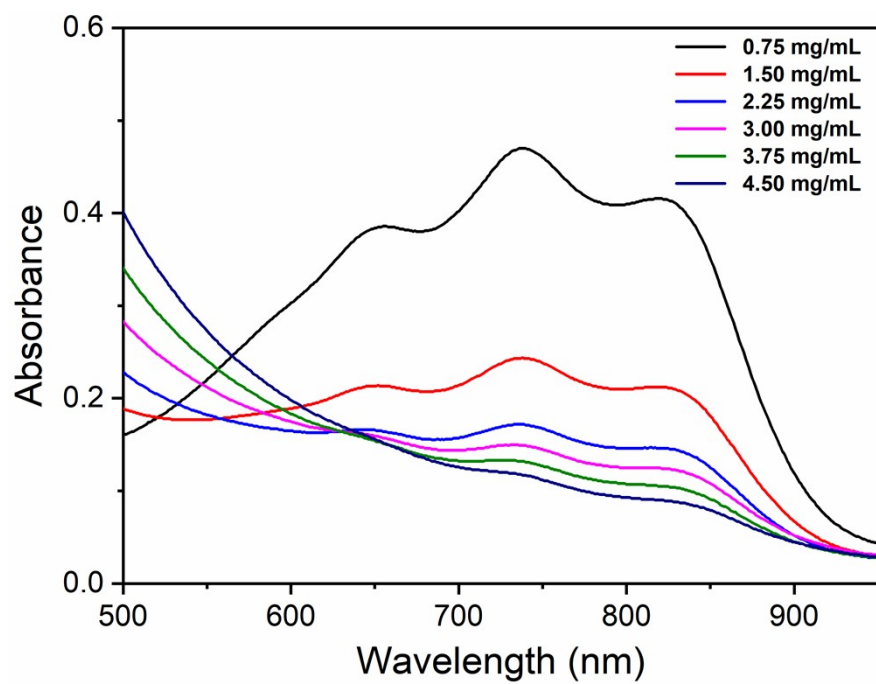

**Fig. S6.** UV-vis absorption spectra of sensing system for H<sub>2</sub>O<sub>2</sub> at different concentrations of ss-CNDs (0.75-4.50 mg·mL<sup>-1</sup>).



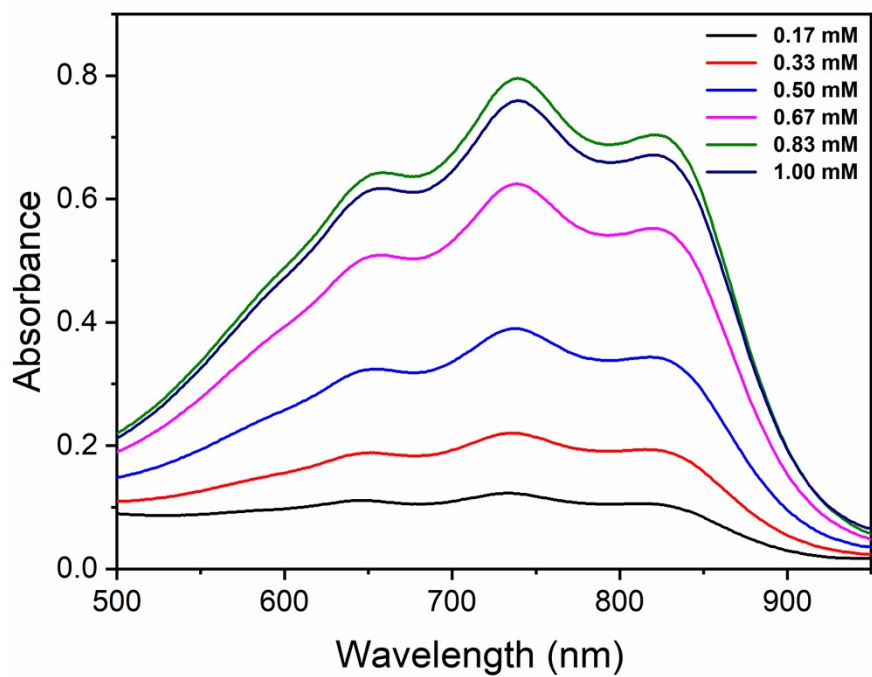

**Fig. S7.** UV-vis absorption spectra of sensing system for H<sub>2</sub>O<sub>2</sub> at different concentrations of ABTS (0.17-1.00 mM).

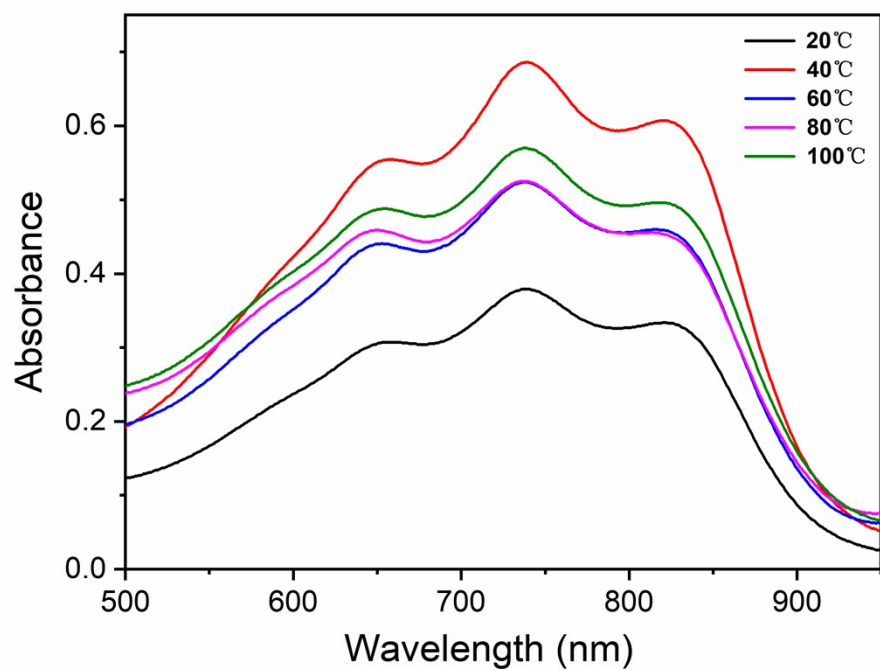

**Fig. S8.** UV-vis absorption spectra of sensing system for H<sub>2</sub>O<sub>2</sub> at different reaction temperature (20-100 °C).

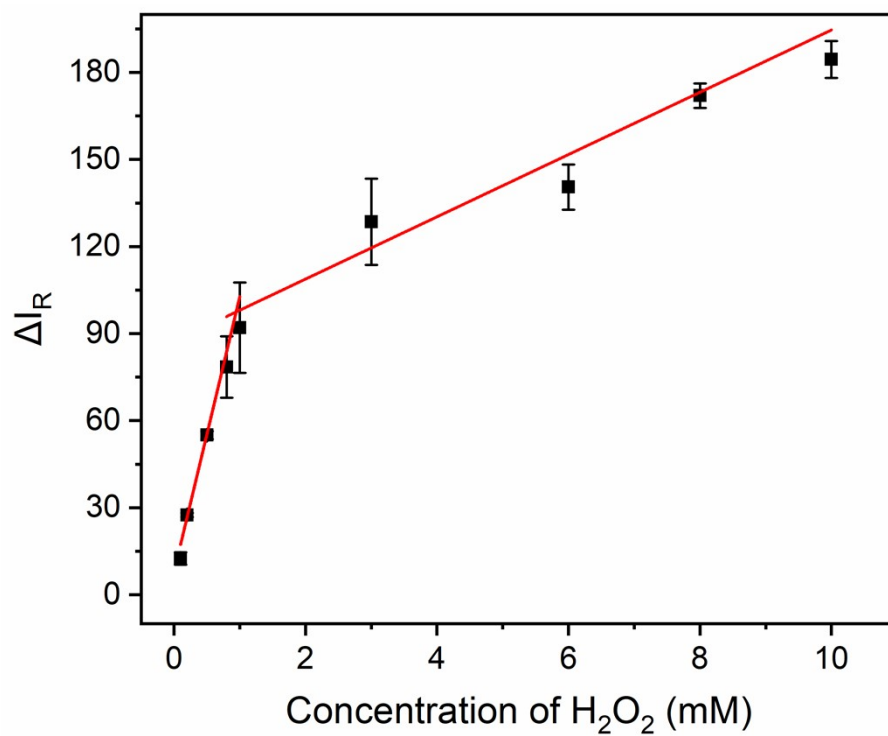

**Fig. S9.** The linear relationship between the change of R value ( $\Delta I_R$ ) of solution and H<sub>2</sub>O<sub>2</sub> concentrations from 0 mM to 10 mM.

**Table S1** Summary of recently reported detection methods for the quantitation of H<sub>2</sub>O<sub>2</sub>

| Methods     | Materials                                                   | Linear range (mM) | LOD ( $\mu$ M) | Reference |
|-------------|-------------------------------------------------------------|-------------------|----------------|-----------|
| Fluorometry | Si-O QDs-Ag NCs                                             | 0.08-60           | 6.5            | S1        |
| Fluorometry | BSA-AuNCs                                                   | 0.001-50          | 0.7            | S2        |
| Fluorometry | CDs-OPD                                                     | 0.001-0.2         | 0.42           | S3        |
| Colorimetry | 4,5-diazafluorene                                           | 0.0005-0.5        | 0.0038         | S4        |
| Colorimetry | Au/Co <sub>3</sub> O <sub>4</sub> -CeO <sub>x</sub> NCs-TMB | 0.01-1            | 5.29           | S5        |
| Colorimetry | V <sub>2</sub> O <sub>5</sub> -Mt-TMB                       | 0.03-0.4          | 4.0            | S6        |
| Colorimetry | CQDs-TMB                                                    | 0.005-0.06        | 0.86           | S7        |
| Colorimetry | ss-CNDs-ABTS                                                | 0.05-10           | 9.53           | This work |

**Table S2** Determination of H<sub>2</sub>O<sub>2</sub> in water samples by this colorimetric assay

| Samples | Added (mM) | Found (mM) | Recovery (%) | RSD (%) |
|---------|------------|------------|--------------|---------|
| Water 1 | 5          | 5.15       | 103.1        | 2.54    |
| Water 2 | 10         | 9.01       | 90.1         | 5.41    |

## References

- S1 R. Dong, Y. Yao, D. Li, H. Zhang, W. Li, M. Molokee, Y. Liu, B. Lei, Ratio fluorescent hybrid probe for visualized fluorescence detection of H<sub>2</sub>O<sub>2</sub> in vitro and in vivo, *Sens. Actuat. B-Chem.*, 2020, 321, 128643.
- S2 V. Jain, S. Bhagat, S. Singh, Bovine serum albumin decorated gold nanoclusters: A fluorescence-based nanoprobe for detection of intracellular hydrogen peroxide, *Sens. Actuat. B-Chem.*, 2021, 327, 128886.
- S3 Y. Li, X. Gu, J. Zhao, F. Xi, Fabrication of a Ratiometric Fluorescence Sensor Based on Carbon Dots as Both Luminophores and Nanozymes for the Sensitive Detection of Hydrogen Peroxide, *Molecules.*, 2022, 27, 7379.
- S4 C. Cebeci, B. Ucar, T. Acar, I. Erden, Colorimetric detection of hydrogen peroxide with gadolinium complex of phenylboronic acid functionalized 4,5-diazafluorene, *Inorganica Chim. Acta.*, 2021, 522, 120386.
- S5 H. Liu, Y. Ding, B. Yang, Z. Liu, Q. Liu, X. Zhang, Colorimetric and ultrasensitive

detection of  $\text{H}_2\text{O}_2$  based on  $\text{Au}/\text{Co}_3\text{O}_4\text{-CeO}_x$  nanocomposites with enhanced peroxidase-like performance, *Sens. Actuat. B-Chem.*, 2018, 271, 336-345.

S6 X. Zhu, Y. Xue, S. Han, W. Chen, M. Fu, Y. Gao, S. Nie, Q. Liu, X. Zhang, X. Zhang,  $\text{V}_2\text{O}_5$ -montmorillonite nanocomposites of peroxidase-like activity and their application in the detection of  $\text{H}_2\text{O}_2$  and glutathione, *Appl. Clay. Sci.*, 2020, 195, 105718.

S7 C. Yuan, X. Qin, Y. Xu, Q. Jing, R. Shi, Y. Wang, High sensitivity detection of  $\text{H}_2\text{O}_2$  and glucose based on carbon quantum dots-catalyzed 3,3',5,5'-tetramethylbenzidine oxidation, *Microchem. J.*, 2020, 159, 105365.
